# Supplementary material
Source: PubMed Central journal article supplement (PMC3744272)
Supplement: DS_10.1177_0022034513497960.pdf [file DS_10.1177_0022034513497960.pdf]

S. Naorungroj<sup>1,2,3\*</sup>, G.D. Slade<sup>2</sup>, J.D. Beck<sup>2</sup>,  
T.H. Mosley<sup>4</sup>, R.F. Gottesman<sup>5</sup>, A. Alonso<sup>6</sup>,  
and G. Heiss<sup>1</sup>

<sup>1</sup>Department of Epidemiology, Gillings School of Global Public Health, University of North Carolina at Chapel Hill, USA; <sup>2</sup>Department of Dental Ecology, School of Dentistry, University of North Carolina at Chapel Hill, USA; <sup>3</sup>Department of Conservative Dentistry, School of Dentistry, Prince of Songkla University, Thailand; <sup>4</sup>Division of Geriatrics, University of Mississippi Medical Center, Jackson, USA; <sup>5</sup>Department of Neurology, Johns Hopkins Hospital, Baltimore, MD, USA; and <sup>6</sup>Division of Epidemiology and Community Health, School of Public Health, University of Minnesota, Minneapolis, USA; \*corresponding author, naorungr@ad.unc.edu or snaorungr@gmail.com

*J Dent Res* DOI: 10.1177/0022034513497960

## APPENDIX

### Appendix 1: Definitions and Classifications

#### 1. Oral health measures

- 1.1. **Self-reported complete tooth loss:** Two screening questions were used to determine dental status: (a) “Do you have any of your natural teeth?” and (b) “Do you have any dental implants?” Participants’ dental status was defined as complete tooth loss if they did not have any natural teeth and received dental implants.
- 1.2. **Periodontitis:** For dentally examined people with no contraindications to periodontal probing, examiners measured probing pocket depth (PPD) and gingival recession (GR) at 6 sites for all teeth present. During data analysis, clinical attachment level (CAL) was calculated as the sum of PPD and GR, and severity of periodontitis was classified as none/mild, moderate, and severe based on a case definition developed by the Centers for Disease Control and Prevention and the American Academy of Periodontology (CDC/AAP) (Page and Eke, 2007). The case definition for moderate periodontitis requires that at least two sites on different teeth have an interproximal CAL > 4 mm or interproximal PPD > 5 mm. Severe periodontitis was defined as two or more interproximal sites with CAL ≥ 6 mm, not on the same tooth, and at least one interproximal site with PPD ≥ 5 mm.
- 1.3. **Number of teeth:** The number of teeth present was recorded for dental study participants who underwent a periodontal examination.
- 1.4. **Plaque deposits:** Plaque deposits for the buccal surface of each tooth were determined as absent, less than 1/3, less than 2/3, and more than 2/3 of the surface. During the analysis, the extent of plaque deposits was computed as the percentage of surfaces with visible plaque.

## Cognitive Decline and Oral Health in Middle-aged Adults in the ARIC Study

- 1.5. **Gingival inflammation:** For each tooth, gingival inflammation was assessed according to the Silness and Løe (1964) Gingival Index (GI) as follows:
  - 0 = normal gingiva
  - 1 = mild (slight change in color, slight edema, no bleeding on probing),
  - 2 = moderate (redness, edema, glazing, bleeding on probing), and
  - 3 = severe inflammation (marked redness and edema, ulceration, tendency to spontaneous bleeding).

During the analysis, the extent of gingival inflammation was computed as the percentage of teeth with GI ≥ 1.

- 1.6. **Oral hygiene care and dental utilization:** The following dental interview questions were used:
  - a. “How often did you brush your teeth yesterday?” Frequency of toothbrushing was categorized as not at all, one time, or two or more times in the preceding day.
  - b. “How often did you use dental floss last week?” Frequency of dental flossing was categorized as not at all, one time, or two or more times in the preceding week.
  - c. “When was the last time you went to the dentist for any reason?” Time since last dental visit was categorized as < 12 mos, 12-36 mos, or > 36 mos.
  - d. “Would you say that you use a dentist on a regular basis, or do you only go when you are in discomfort or when you need something fixed?” Reasons for dental visits were categorized as on a regular basis, when there is a problem, and do not see a dentist.

#### 2. Covariates

Participants’ education was classified as basic (< 12 yrs), intermediate (12-16 yrs), or advanced (≥ 17 yrs). Income was coded as < \$25,000, \$25,000-\$50,000, >\$50,000, or refused to answer. Five categories of the race-center variable were Forsyth/Black, Forsyth/White, Minneapolis/White, Washington/Black, and

Jackson/Black. Diabetic status was determined by fasting plasma glucose  $\geq 126$  mg/dL, non-fasting plasma glucose  $\geq 200$  mg/dL, self-reported history of physician-diagnosed diabetes, or current medication for diabetes. Hypertension was defined as a previous diagnosis of hypertension, taking hypertensive medication, or having a current systolic blood pressure of 140 mm Hg or higher or a diastolic blood pressure of 90 mm Hg. Stroke was

defined as a self-reported history of physician-diagnosed stroke or a stroke validated by an ARIC clinician through a review of medical records. Coronary heart disease (CHD) was defined as adjudicated myocardial infarction on the electrocardiogram at baseline, prior self-reported history of myocardial infarction, coronary artery bypass surgery, or angioplasty. Smoking and alcohol drinking were self-reported as never, former, or current.

## Appendix 2: Prevalence Difference Calculation

Odds = Prevalence / (1 - Prevalence)

Prevalence = Odds / (1 + Odds)

Odds  $\sim$  Prevalence if prevalence is relatively small ( $< 10\%$ ).

Prevalence difference = Prevalence among exposed group – Prevalence of unexposed group

### Example 1: Toothbrushing

Prevalence of not brushing teeth (Table 1; main paper)

= 1.6%

= 0.016

Odds of not brushing teeth

= 0.016 / (1 - 0.016)

=  $\sim 0.01626$

Odds ratio of not brushing teeth (Table 3; main paper)

= 1.29

Thus, odds for one-unit increase in cognitive decline scores

= 1.29  $\times$  0.01626

= 0.02097

Prevalence of one-unit increase in cognitive decline score

= 0.02097 / (1 + 0.02097)

= 0.0205

Prevalence difference

= 0.0205 - 0.016

= 0.0045

= 0.45%

### Example 2: Complete tooth loss

Prevalence of complete tooth loss (Table 1; main paper)

= 12.6%

= 0.126

Odds of complete tooth loss

= 0.126 / (1 - 0.126)

= 0.14416

Odds ratio of complete tooth loss (Table 2; main paper)

$\sim 1.10$

Thus, odds for one-unit increase in cognitive decline scores

= 1.10  $\times$  0.14416

= 0.15858

Prevalence of one-unit increase in cognitive decline score

= 0.15858 / (1 + 0.15858)

= 0.13687

Prevalence difference

= 0.14416 - 0.13687

= 0.00729

= 0.73%

## APPENDIX REFERENCES

Page RC, Eke PI (2007). Case definitions for use in population-based surveillance of periodontitis. *J Periodontol* 78(7 Suppl):1387S-1399S.

Silness J, L oe H (1964). Periodontal disease in pregnancy. II: Correlation between oral hygiene and periodontal condition. *Acta Odontol Scand* 22:121-135.

**Appendix Table 1.** Crude Associations between a Six-year Cognitive Decline<sup>1</sup> and Oral Health Measures

| Dependent Variables                           | N      | Delayed Word Recall      | Digit Symbol Substitution | Word Fluency         |
|-----------------------------------------------|--------|--------------------------|---------------------------|----------------------|
|                                               |        | β (upper, lower 95% CI)  |                           |                      |
| Oral health conditions                        |        |                          |                           |                      |
| Mean number of remaining teeth                | 5,878  | -0.37 (-0.56, -0.19)     | -0.40 (-0.58, -0.21)      | -0.24 (-0.42, -0.06) |
| Extent of dental deposit <sup>2</sup>         | 5,878  | 1.83 (0.85, 2.80)        | 2.04 (1.07, 3.02)         | 0.84 (-0.12, 1.80)   |
| Extent of gingival inflammation <sup>3</sup>  | 5,638  | 0.48 (-0.55, 1.52)       | 0.45 (-0.59, 1.49)        | -0.18 (-1.21, 0.85)  |
|                                               |        | OR (upper, lower 95% CI) |                           |                      |
| OR for severe periodontitis <sup>4</sup>      | 5,878  | 1.05 (0.98, 1.13)        | 1.11 (1.03, 1.19)         | 0.99 (0.92, 1.06)    |
| OR for complete tooth loss <sup>5</sup>       | 10,050 | 1.25 (1.18, 1.32)        | 1.20 (1.13, 1.27)         | 1.18 (1.11, 1.25)    |
| Oral hygiene cares                            |        |                          |                           |                      |
| Toothbrushing <sup>6</sup>                    | 8,782  |                          |                           |                      |
| OR for no toothbrushing                       |        | 1.03 (0.86, 1.22)        | 1.36 (1.17, 1.58)         | 1.26 (1.06, 1.48)    |
| OR for brushing once per day                  |        | 1.08 (1.03, 1.13)        | 1.03 (0.99, 1.08)         | 1.07 (1.02, 1.12)    |
| Flossing <sup>7</sup>                         | 8,782  |                          |                           |                      |
| OR for no flossing                            |        | 1.07 (1.03, 1.13)        | 1.04 (1.00, 1.10)         | 1.05 (1.00, 1.10)    |
| OR for flossing once per week                 |        | 1.01 (0.93, 1.09)        | 1.03 (0.95, 1.11)         | 1.05 (0.97, 1.14)    |
| Dental utilization                            |        |                          |                           |                      |
| Last dentist visit <sup>8</sup>               | 8,782  |                          |                           |                      |
| OR for last dental visit > 36 mos             |        | 1.07 (1.00, 1.16)        | 1.05 (0.98, 1.13)         | 1.06 (0.98, 1.14)    |
| OR for last dental visit 12- < 36 mos         |        | 1.02 (0.96, 1.09)        | 1.04 (0.98, 1.11)         | 1.03 (0.96, 1.09)    |
| Reasons to visit a dentist <sup>9</sup>       | 8,782  |                          |                           |                      |
| OR for not visiting a dentist                 |        | 1.11 (0.91, 1.35)        | 1.17 (0.97, 1.42)         | 1.17 (0.96, 1.43)    |
| OR for visiting a dentist when problems occur |        | 1.08 (1.03, 1.14)        | 1.08 (1.03, 1.14)         | 1.06 (1.01, 1.11)    |

OR, Odds ratios; β, regression coefficient; CI, Confidence intervals.

<sup>1</sup>A six-year change in cognitive scores was expressed as race- and gender-specific 'studentized' residuals.

<sup>2</sup>Extent of plaque deposit was a percentage of buccal surfaces with visible plaque.

<sup>3</sup>Extent of gingival inflammation was a percentage of teeth with Löe & Silness Gingival Index (GI) score ≥ 1.

<sup>4</sup>OR and 95% CI from binary logistic regression models estimated the associations between cognitive decline, and odds of severe periodontal disease vs. no/mild/moderate periodontal disease [The Centers for Disease Control and Prevention/The American Academy of Periodontology (CDC/AAP) classification].

<sup>5</sup>OR and 95% CI from binary logistic regression models estimated the associations between cognitive decline, and odds of complete tooth loss vs. dentate.

<sup>6</sup>OR and 95% CI from multinomial logistic regression models estimated the associations between cognitive decline, and odds of no toothbrushing and brushing once per day vs. brushing twice per day.

<sup>7</sup>OR and 95% CI from multinomial logistic regression models estimated the associations between cognitive decline, and odds of no flossing and flossing once per week vs. brushing twice per week.

<sup>8</sup>OR and 95% CI from multinomial logistic regression models estimated the associations between cognitive decline, and odds of last dental visit > 36 mos and 12- < 36 mos vs. < 12 mos.

<sup>9</sup>OR and 95% CI from multinomial logistic regression models estimated the associations between cognitive decline, and odds of not visiting a dentist and visiting a dentist only when problems occur vs. visiting a dentist on a regular basis.

**Appendix Table 2.** Associations between Selected Characteristics and a Six-year Cognitive Decline<sup>1</sup> for Dentally Screened Participants (n = 10,050)

| Characteristics        | Col% | Delayed Word Recall |         | Digit Symbol Substitution |         | Word Fluency   |         |
|------------------------|------|---------------------|---------|---------------------------|---------|----------------|---------|
|                        |      | mean ± SE           | p value | mean ± SE                 | p value | mean ± SE      | p value |
| Age at examination 2   |      |                     |         |                           |         |                |         |
| > 65 yrs               | 7.4  | 0.34 ± 0.03         | < .0001 | 0.27 ± 0.04               | < .0001 | 0.097 ± 0.04   | < .0001 |
| 55-65 yrs              | 53.2 | 0.04 ± 0.01         |         | 0.073 ± 0.01              |         | 0.03 ± 0.01    |         |
| 46-54 yrs              | 39.4 | -0.16 ± 0.02        |         | -0.18 ± 0.02              |         | -0.076 ± 0.02  |         |
| Study sites            |      |                     |         |                           |         |                |         |
| Forsyth                | 25.7 | -0.11 ± 0.02        | < .0001 | -0.20 ± 0.02              | < .0001 | 0.028 ± 0.02   | < .0001 |
| Jackson                | 16.2 | -0.016 ± 0.02       |         | -0.0062 ± 0.02            |         | -0.016 ± 0.02  |         |
| Minneapolis            | 30.1 | -0.0041 ± 0.02      |         | 0.13 ± 0.02               |         | 0.059 ± 0.02   |         |
| Washington             | 27.9 | 0.057 ± 0.02        |         | 0.0061 ± 0.02             |         | -0.10 ± 0.02   |         |
| Education              |      |                     |         |                           |         |                |         |
| Basic                  | 16.9 | 0.19 ± 0.02         | < .0001 | 0.18 ± 0.02               | < .0001 | 0.19 ± 0.02    | < .0001 |
| Intermediate           | 43.2 | 0.0009 ± 0.01       |         | 0.0031 ± 0.01             |         | 0.025 ± 0.02   |         |
| Advanced               | 39.9 | -0.12 ± 0.02        |         | -0.11 ± 0.02              |         | -0.12 ± 0.02   |         |
| Income                 |      |                     |         |                           |         |                |         |
| < \$25,000             | 29.3 | 0.13 ± 0.02         | < .0001 | 0.14 ± 0.02               | < .0001 | 0.10 ± 0.02    | < .0001 |
| \$25- < \$50,000       | 35.4 | -0.02 ± 0.02        |         | 0.0095 ± 0.02             |         | 0.0038 ± 0.02  |         |
| \$50,000 or more       | 33.2 | -0.15 ± 0.02        |         | -0.18 ± 0.02              |         | -0.13 ± 0.02   |         |
| Refused to provide     | 2.2  | 0.07 ± 0.07         |         | 0.084 ± 0.07              |         | 0.21 ± 0.07    |         |
| Cigarette use          |      |                     |         |                           |         |                |         |
| Current                | 19.1 | 0.0015 ± 0.02       | .1157   | 0.023 ± 0.02              | .1423   | 0.016 ± 0.02   | .4860   |
| Former                 | 39.0 | 0.0021 ± 0.02       |         | -0.0096 ± 0.02            |         | -0.018 ± 0.02  |         |
| Never                  | 41.9 | -0.04 ± 0.01        |         | -0.031 ± 0.01             |         | -0.0063 ± 0.01 |         |
| Alcohol use            |      |                     |         |                           |         |                |         |
| Current                | 59.9 | -0.047 ± 0.01       | .0002   | -0.038 ± 0.01             | .0008   | -0.047 ± 0.01  | < .0001 |
| Former                 | 18.7 | 0.05 ± 0.02         |         | 0.06 ± 0.02               |         | 0.048 ± 0.02   |         |
| Never                  | 21.4 | 0.017 ± 0.02        |         | -0.0025 ± 0.02            |         | 0.059 ± 0.02   |         |
| Diabetes mellitus      |      |                     |         |                           |         |                |         |
| Yes                    | 12.4 | 0.13 ± 0.03         | < .0001 | 0.17 ± 0.03               | < .0001 | 0.12 ± 0.03    | < .0001 |
| No                     | 87.6 | -0.04 ± 0.01        |         | -0.039 ± 0.01             |         | -0.025 ± 0.01  |         |
| Hypertension           |      |                     |         |                           |         |                |         |
| Yes                    | 32.3 | 0.056 ± 0.02        | < .0001 | 0.10 ± 0.02               | < .0001 | 0.04 ± 0.02    | .0013   |
| No                     | 67.7 | -0.05 ± 0.01        |         | -0.066 ± 0.01             |         | -0.029 ± 0.01  |         |
| Coronary heart disease |      |                     |         |                           |         |                |         |
| Yes                    | 4.6  | 0.13 ± 0.05         | < .0016 | 0.17 ± 0.05               | < .0001 | 0.11 ± 0.05    | .0125   |
| No                     | 95.4 | -0.022 ± 0.01       |         | -0.021 ± 0.01             |         | -0.012 ± 0.01  |         |
| Stroke                 |      |                     |         |                           |         |                |         |
| Yes                    | 1.2  | 0.31 ± 0.09         | .0003   | 0.21 ± 0.09               | .0147   | 0.07 ± 0.09    | .3976   |
| No                     | 98.8 | -0.019 ± 0.01       |         | -0.015 ± 0.01             |         | -0.0075 ± 0.01 |         |

n, total number of study group; SE, standard error.

<sup>1</sup>A six-year change in cognitive scores was expressed as race- and gender-specific 'studentized' residuals. In the analyses, 'studentized' residuals were reversed, namely, positive, negative, and zero values referred to poorer, better, or unchanged cognitive performance, respectively.

**Appendix Table 3.** Associations between Selected Characteristics and a Six-year Cognitive Decline<sup>1</sup> for Participants Who Received Comprehensive Dental Examination (n = 5,878)

| Characteristics        | Col% | Delayed Word Recall |         | Digit Symbol Substitution |         | Word Fluency   |         |
|------------------------|------|---------------------|---------|---------------------------|---------|----------------|---------|
|                        |      | mean ± SE           | p value | mean ± SE                 | p value | mean ± SE      | p value |
| Age at examination 2   |      |                     |         |                           |         |                |         |
| > 65 yrs               | 6.4  | 0.33 ± 0.05         | < .0001 | 0.22 ± 0.05               | < .0001 | 0.027 ± 0.05   | .0020   |
| 55-65 yrs              | 51.3 | 0.017 ± 0.02        |         | 0.031 ± 0.02              |         | 0.0062 ± 0.02  |         |
| 46-54 yrs              | 42.3 | -0.19 ± 0.02        |         | -0.22 ± 0.02              |         | -0.084 ± 0.02  |         |
| Study sites            |      |                     |         |                           |         |                |         |
| Forsyth                | 27.3 | -0.14 ± 0.02        | < .0001 | -0.27 ± 0.02              | < .0001 | 0.023 ± 0.02   | < .0001 |
| Jackson                | 15.1 | -0.07 ± 0.03        |         | -0.067 ± 0.03             |         | -0.065 ± 0.03  |         |
| Minneapolis            | 35.4 | -0.026 ± 0.02       |         | 0.11 ± 0.02               |         | 0.019 ± 0.02   |         |
| Washington             | 22.3 | 0.03 ± 0.03         |         | -0.075 ± 0.03             |         | -0.15 ± 0.03   |         |
| Education              |      |                     |         |                           |         |                |         |
| Basic                  | 12.1 | 0.11 ± 0.04         | < .0001 | 0.11 ± 0.04               | < .0001 | 0.13 ± 0.04    | < .0001 |
| Intermediate           | 43.7 | -0.017 ± 0.02       |         | -0.026 ± 0.02             |         | 0.02 ± 0.02    |         |
| Advanced               | 44.2 | -0.13 ± 0.02        |         | -0.14 ± 0.02              |         | -0.13 ± 0.02   |         |
| Income                 |      |                     |         |                           |         |                |         |
| < \$25,000             | 23.4 | 0.087 ± 0.03        | < .0001 | 0.06 ± 0.03               | < .0001 | 0.041 ± 0.03   | < .0001 |
| \$25- < \$50,000       | 36.1 | -0.043 ± 0.02       |         | 0.0014 ± 0.02             |         | -0.0016 ± 0.02 |         |
| \$50,000 or more       | 38.4 | -0.15 ± 0.02        |         | -0.20 ± 0.02              |         | -0.11 ± 0.02   |         |
| Refused to provide     | 2.1  | 0.0017 ± 0.09       |         | -0.055 ± 0.09             |         | 0.12 ± 0.09    |         |
| Cigarette use          |      |                     |         |                           |         |                |         |
| Current                | 16.7 | -0.041 ± 0.03       | .3267   | -0.015 ± 0.03             | .1516   | -0.0063 ± 0.03 | .3708   |
| Former                 | 39.6 | -0.031 ± 0.02       |         | -0.057 ± 0.02             |         | -0.052 ± 0.02  |         |
| Never                  | 43.7 | -0.073 ± 0.02       |         | -0.085 ± 0.02             |         | -0.02 ± 0.02   |         |
| Alcohol use            |      |                     |         |                           |         |                |         |
| Current                | 63.1 | -0.071 ± 0.02       | .1276   | -0.076 ± 0.02             | .2336   | -0.053 ± 0.02  | .0632   |
| Former                 | 16.5 | -0.0098 ± 0.03      |         | -0.015 ± 0.03             |         | 0.019 ± 0.03   |         |
| Never                  | 20.4 | -0.023 ± 0.03       |         | -0.06 ± 0.03              |         | 0.0011 ± 0.03  |         |
| Diabetes mellitus      |      |                     |         |                           |         |                |         |
| Yes                    | 10.7 | 0.066 ± 0.04        | .0016   | 0.11 ± 0.04               | < .0001 | 0.11 ± 0.04    | .0003   |
| No                     | 88.3 | -0.065 ± 0.01       |         | -0.084 ± 0.01             |         | -0.047 ± 0.01  |         |
| Hypertension           |      |                     |         |                           |         |                |         |
| Yes                    | 28.9 | 0.0005 ± 0.02       | .0106   | 0.042 ± 0.02              | < .0001 | 0.023 ± 0.02   | .0089   |
| No                     | 71.1 | -0.072 ± 0.01       |         | -0.10 ± 0.01              |         | -0.052 ± 0.01  |         |
| Coronary heart disease |      |                     |         |                           |         |                |         |
| Yes                    | 3.0  | 0.065 ± 0.07        | .1116   | 0.0064 ± 0.07             | .3468   | 0.038 ± 0.07   | .3580   |
| No                     | 97.0 | -0.054 ± 0.01       |         | -0.064 ± 0.01             |         | -0.033 ± 0.01  |         |
| Stroke                 |      |                     |         |                           |         |                |         |
| Yes                    | 0.8  | 0.21 ± 0.14         | .0666   | 0.28 ± 0.14               | .0134   | -0.021 ± 0.14  | .9483   |
| No                     | 99.2 | -0.053 ± 0.01       |         | -0.065 ± 0.01             |         | -0.03 ± 0.01   |         |

n, total number of study group; SE, standard error.

<sup>1</sup>A six-year change in cognitive scores was expressed as race- and gender-specific 'studentized'. In the analysis, 'studentized' residuals were reversed, namely, positive, negative, and zero values referred to poorer, better, or unchanged cognitive performance, respectively.

**Appendix Table 4.** Comparison of Oral Health Behaviors and Dental Utilizations of Participants Who Were Edentulous and Those Who Were Dentate (n = 10,050)

| Oral Health Behaviors and Dental Utilizations | Edentulous (n = 1,268) | Dentate (n = 8,782) |
|-----------------------------------------------|------------------------|---------------------|
| Toothbrushing, n (%)                          |                        |                     |
| Not at all                                    | 528 (41.6)             | 137 (1.6)           |
| Once a day                                    | 354 (27.9)             | 2,464 (28.1)        |
| Twice a day or more                           | 386 (30.5)             | 6,181 (70.3)        |
| Flossing, n (%)                               |                        |                     |
| Not at all                                    | 1,235 (97.4)           | 3,109 (35.4)        |
| Once a day                                    | 10 (0.8)               | 725 (8.3)           |
| Twice a day or more                           | 23 (1.8)               | 4,948 (56.3)        |
| Last dental visit, n (%)                      |                        |                     |
| >36 mos                                       | 865 (68.2)             | 807 (9.2)           |
| 12- < 36 mos                                  | 207 (16.3)             | 1,114 (12.7)        |
| < 12 mos                                      | 196 (15.5)             | 6,861 (78.1)        |
| Reasons to visit a dentist, n (%)             |                        |                     |
| Do not visit a dentist                        | 179 (14.1)             | 98 (1.1)            |
| When problems occur                           | 1,021 (80.5)           | 2,213 (25.2)        |
| Regularly                                     | 68 (5.3)               | 6,471 (73.6)        |

**Appendix Table 5.** Self-reported History of Prosthesis Use among Study Participants Who Had Tooth Loss, by Dental Status

|                                     | Dentate Status (n = 10,050) |                          |
|-------------------------------------|-----------------------------|--------------------------|
|                                     | Edentulous (n = 1,268)      | Dentate (n = 8,782)      |
| Had false teeth, n (%)              |                             |                          |
| Yes                                 | 1,238 (97.6)                | 3,996 (45.5)             |
| No                                  | 24 (1.9)                    | 3,981 (45.3)             |
| Missing                             | 6 (0.5)                     | 805 (9.2)                |
| Age when got first false teeth, yrs |                             |                          |
| Mean ± SD                           | 36.2 ± 13.6 <sup>1</sup>    | 39.5 ± 14.8 <sup>2</sup> |
| Range                               | 73-12                       | 74-8                     |
| Age at examination 2, yrs           |                             |                          |
| Mean ± SD                           | 58.3 ± 5.5                  | 57.1 ± 5.5               |
| Range                               | 68-47                       | 68-47                    |

n, total number of study group; SD, standard deviation.

<sup>1</sup>Of 1,238 edentulous participants, 1,186 (95.8%) reported age when they got first false teeth.

<sup>2</sup>Of 3,996 dentate participants, 3,794 (94.9%) reported age when they got first false teeth.

**Appendix Table 6.** Characteristics of ARIC Dentate Participants Who Received and Did Not Receive Dental Examination at Examination 4

| Characteristics                   | Dental Examination   |                             | Odd Ratios (95% CI) |
|-----------------------------------|----------------------|-----------------------------|---------------------|
|                                   | Received (n = 6,676) | Did Not Receive (n = 3,050) |                     |
| Age at examination 2, row%        |                      |                             |                     |
| > 65 yrs                          | 64.6                 | 35.4                        | 0.78 (0.64, 0.91)   |
| 55-65 yrs                         | 68.2                 | 31.8                        | 0.90 (0.82, 0.99)   |
| 46-54 yrs                         | 70.4                 | 29.6                        | Ref                 |
| Gender, row%                      |                      |                             |                     |
| Male                              | 70.7                 | 29.3                        | 1.18 (1.09, 1.29)   |
| Female                            | 67.0                 | 33.0                        | Ref                 |
| Race, row%                        |                      |                             |                     |
| African-American                  | 61.9                 | 38.1                        | 0.68 (0.62, 0.76)   |
| Whites                            | 70.4                 | 29.6                        | Ref                 |
| Study sites, row%                 |                      |                             |                     |
| Forsyth                           | 71.0                 | 29.0                        | 1.18 (1.05, 1.34)   |
| Jackson                           | 61.8                 | 38.2                        | 0.78 (0.69, 0.89)   |
| Minneapolis                       | 72.0                 | 28.0                        | 1.25 (1.11, 1.40)   |
| Washington                        | 67.3                 | 32.7                        | Ref                 |
| Education, row%                   |                      |                             |                     |
| Basic                             | 61.9                 | 38.1                        | 0.70 (0.62, 0.79)   |
| Intermediate                      | 69.7                 | 30.3                        | 0.99 (0.90, 1.09)   |
| Advanced                          | 69.9                 | 30.1                        | Ref                 |
| Income, row%                      |                      |                             |                     |
| Refused to provide                | 66.1                 | 33.9                        | 0.73 (0.55, 0.98)   |
| < \$25,000                        | 63.3                 | 36.7                        | 0.65 (0.58, 0.73)   |
| \$25- < \$50,000                  | 70.3                 | 29.7                        | 0.89 (0.80, 0.99)   |
| \$50,000 or more                  | 72.6                 | 27.4                        | Ref                 |
| Cigarette use, row%               |                      |                             |                     |
| Current                           | 64.8                 | 35.2                        | 0.78 (0.69, 0.88)   |
| Former                            | 69.4                 | 30.6                        | 0.96 (0.87, 1.06)   |
| Never                             | 70.2                 | 29.8                        | Ref                 |
| Alcohol use, row%                 |                      |                             |                     |
| Current                           | 70.1                 | 29.9                        | 1.09 (0.98, 1.22)   |
| Former                            | 65.4                 | 34.6                        | 0.88 (0.76, 1.01)   |
| Never                             | 68.3                 | 31.7                        | Ref                 |
| Diabetes mellitus, row%           |                      |                             |                     |
| Yes                               | 64.6                 | 35.4                        | 0.80 (0.70, 0.91)   |
| No                                | 69.5                 | 30.5                        | Ref                 |
| Hypertension, row%                |                      |                             |                     |
| Yes                               | 63.9                 | 36.1                        | 0.72 (0.65, 0.78)   |
| No                                | 71.2                 | 28.8                        | Ref                 |
| Coronary heart disease, row%      |                      |                             |                     |
| Yes                               | 51.6                 | 48.4                        | 0.46 (0.37, 0.56)   |
| No                                | 69.8                 | 30.2                        | Ref                 |
| Stroke, row%                      |                      |                             |                     |
| Yes                               | 53.5                 | 49.5                        | 0.52 (0.36, 0.75)   |
| No                                | 69.0                 | 31.0                        | Ref                 |
| Cognitive function, mean $\pm$ SD |                      |                             |                     |
| DWR at examination 2              | 6.79 $\pm$ 1.46      | 6.71 $\pm$ 1.48             | 0.0193              |
| DSS at examination 2              | 47.92 $\pm$ 12.95    | 45.73 $\pm$ 13.71           | < 0.0001            |
| WF at examination 2               | 35.08 $\pm$ 12.08    | 34.29 $\pm$ 12.24           | 0.7596              |
| DWR at examination 4              | 6.66 $\pm$ 1.57      | 6.59 $\pm$ 1.59             | 0.0454              |
| DSS at examination 4              | 45.52 $\pm$ 12.61    | 43.29 $\pm$ 13.69           | <0.0001             |
| WF at examination 4               | 34.67 $\pm$ 12.36    | 33.70 $\pm$ 12.46           | 0.0004              |

DWR, Delayed word recall; DSS, Digit symbol substitution; Ref, Reference; WF, Word fluency.

**Appendix Table 7.** Association between a Six-year Cognitive Decline<sup>1</sup> and Oral Health Conditions

| Cognitive Function                     | $\beta$ (upper, lower 95% CI)               |                                                |                                                           | OR (upper, lower 95% CI)                       |                                             |
|----------------------------------------|---------------------------------------------|------------------------------------------------|-----------------------------------------------------------|------------------------------------------------|---------------------------------------------|
|                                        | Mean Number of Remaining Teeth<br>n = 5,878 | Extent of Dental Plaque <sup>2</sup> n = 5,878 | Extent of Gingival Inflammation <sup>3</sup><br>n = 5,638 | Severe Periodontitis <sup>4</sup><br>n = 5,878 | Complete Tooth Loss <sup>5</sup> n = 10,050 |
| Delayed word recall <sup>6</sup>       |                                             |                                                |                                                           |                                                |                                             |
| 1st tercile                            | -0.13 (-0.54, 0.29)                         | 1.96 (-0.093, 4.01)                            | 0.39 (-1.50, 2.27)                                        | 0.92 (0.76, 1.10)                              | 1.33 (1.13, 1.56)                           |
| 2nd tercile                            | -0.11 (-0.50, 0.28)                         | -0.27 (-2.18, 1.64)                            | -0.18 (-1.93, 1.57)                                       | 0.88 (0.74, 1.04)                              | 1.16 (0.99, 1.37)                           |
| 3rd tercile                            | Ref                                         | Ref                                            | Ref                                                       | Ref                                            | Ref                                         |
| Digit symbol substitution <sup>6</sup> |                                             |                                                |                                                           |                                                |                                             |
| 1st tercile                            | -0.42 (-0.83, -0.01)                        | 1.25 (-0.77, 3.27)                             | 1.81 (-0.045, 3.66)                                       | 1.06 (0.89, 1.28)                              | 1.19 (1.02, 1.40)                           |
| 2nd tercile                            | -0.088 (-0.48, 0.31)                        | -0.13 (-0.26, 1.80)                            | 1.25 (-0.52, 3.03)                                        | 1.03 (0.86, 1.22)                              | 1.16 (0.99, 1.37)                           |
| 3rd tercile                            | Ref                                         | Ref                                            | Ref                                                       | Ref                                            | Ref                                         |
| Word fluency <sup>6</sup>              |                                             |                                                |                                                           |                                                |                                             |
| 1st tercile                            | -0.37 (-0.78, 0.03)                         | 1.57 (-0.41, 3.54)                             | -0.11 (-1.92, 1.71)                                       | 0.90 (0.75, 1.08)                              | 1.19 (1.01, 1.40)                           |
| 2nd tercile                            | -0.23 (-0.63, 0.16)                         | 1.24 (-0.70, 3.18)                             | 0.38 (-1.41, 2.16)                                        | 1.03 (0.87, 1.23)                              | 1.26 (1.07, 1.47)                           |
| 3rd tercile                            | Ref                                         | Ref                                            | Ref                                                       | Ref                                            | Ref                                         |

OR, Odds ratios; CI, confidence interval;  $\beta$ , regression coefficient; Ref, Reference.

<sup>1</sup>A six-year change in cognitive scores was expressed as race- and gender-specific 'studentized' residuals. Scores were categorized into three groups according to terciles. The first tercile consisted of people with the greatest cognitive decline.

<sup>2</sup>Extent of plaque deposits was a percentage of buccal surfaces with visible plaque.

<sup>3</sup>Extent of gingival inflammation was a percentage of teeth with Löe & Silness Gingival Index (GI) score  $\geq 1$ .

<sup>4</sup>OR and 95% CI from binary logistic regression models estimated the associations between cognitive decline, and odds of severe periodontitis vs. no/mild/moderate periodontitis [The Centers for Disease Control and Prevention/The American Academy of Periodontology (CDC/AAP) classification].

<sup>5</sup>OR and 95% CI from binary logistic regression models estimated the associations between cognitive decline, and odds of complete tooth loss vs. dentate status.

<sup>6</sup>Adjusted for age, gender, race-center, education, cigarette use, alcohol use, and health history.

**Appendix Table 8.** Association between a Six-year Change in Cognitive Decline<sup>1</sup> and Oral Hygiene Care

| Cognitive Function                     | OR (upper, lower 95% CI)               |                     |                                          |                      |
|----------------------------------------|----------------------------------------|---------------------|------------------------------------------|----------------------|
|                                        | Toothbrushing <sup>2</sup> (n = 8,782) |                     | Dental Flossing <sup>3</sup> (n = 8,782) |                      |
|                                        | No brushing                            | Brushing once a day | No flossing                              | Flossing once a week |
| Delayed word recall <sup>4</sup>       |                                        |                     |                                          |                      |
| 1st tercile                            | 0.90 (0.59, 1.38)                      | 1.13 (1.00, 1.28)   | 1.09 (0.97, 1.24)                        | 1.06 (0.86, 1.29)    |
| 2nd tercile                            | 0.79 (0.52, 1.20)                      | 1.03 (0.91, 1.15)   | 1.04 (0.92, 1.16)                        | 1.05 (0.87, 1.27)    |
| 3rd tercile                            | Ref                                    | Ref                 | Ref                                      | Ref                  |
| Digit symbol substitution <sup>4</sup> |                                        |                     |                                          |                      |
| 1st tercile                            | 1.41 (0.90, 2.21)                      | 1.01 (0.90, 1.15)   | 1.03 (0.92, 1.17)                        | 1.15 (0.94, 1.40)    |
| 2nd tercile                            | 1.39 (0.89, 2.18)                      | 1.08 (0.96, 1.22)   | 1.01 (0.90, 1.14)                        | 1.15 (0.95, 1.39)    |
| 3rd tercile                            | Ref                                    | Ref                 | Ref                                      | Ref                  |
| Word fluency <sup>4</sup>              |                                        |                     |                                          |                      |
| 1st tercile                            | 1.63 (1.06, 2.51)                      | 1.14 (1.01, 1.28)   | 1.13 (1.01, 1.23)                        | 1.08 (0.88, 1.31)    |
| 2nd tercile                            | 1.05 (0.66, 1.67)                      | 1.05 (0.93, 1.18)   | 1.18 (1.05, 1.33)                        | 1.18 (0.97, 1.43)    |
| 3rd tercile                            | Ref                                    | Ref                 | Ref                                      | Ref                  |

OR, Odds ratios; CI, confidence interval; Ref, Reference.

<sup>1</sup>A six-year change in cognitive scores was expressed as race- and gender-specific 'studentized' residuals. Scores were categorized into three groups according to terciles. The first tercile consisted of people with the greatest cognitive decline.

<sup>2</sup>OR and 95% CI from multinomial logistic regression models estimated the associations between cognitive decline, and odds of no toothbrushing and brushing once *per day* vs. brushing twice *per day*.

<sup>3</sup>OR and 95% CI from multinomial logistic regression models estimated the associations between cognitive decline, and odds of no flossing and flossing once *per week* vs. flossing twice *per week*.

<sup>4</sup>Adjusted for age, gender, race-center, education, cigarette use, alcohol use, and health history.



**Appendix Table 9.** Association between a Six-year Change in Cognitive Decline<sup>1</sup> and Dental Utilization

| Cognitive Function                     | OR (upper, lower 95% CI)                   |                   |                                                     |                     |
|----------------------------------------|--------------------------------------------|-------------------|-----------------------------------------------------|---------------------|
|                                        | Last Dental Visit <sup>2</sup> (n = 8,782) |                   | Reasons to Visit a Dentist <sup>3</sup> (n = 8,782) |                     |
|                                        | >36 mos                                    | 12- < 36 mos      | Do not visit a dentist                              | When problems occur |
| Delayed word recall <sup>4</sup>       |                                            |                   |                                                     |                     |
| 1st tercile                            | 1.05 (0.86, 1.28)                          | 1.05 (0.89, 1.24) | 1.14 (0.69, 1.90)                                   | 1.10 (0.96, 1.27)   |
| 2nd tercile                            | 1.00 (0.83, 1.21)                          | 0.87 (0.74, 1.02) | 1.11 (0.96, 1.27)                                   | 0.97 (0.85, 1.11)   |
| 3rd tercile                            | Ref                                        | Ref               | Ref                                                 | Ref                 |
| Digit symbol substitution <sup>4</sup> |                                            |                   |                                                     |                     |
| 1st tercile                            | 1.02 (0.84, 1.24)                          | 1.00 (0.85, 1.18) | 1.17 (0.67, 2.02)                                   | 1.15 (1.00, 1.32)   |
| 2nd tercile                            | 1.08 (0.89, 1.31)                          | 0.97 (0.83, 1.14) | 1.70 (1.03, 2.82)                                   | 1.15 (1.01, 1.32)   |
| 3rd tercile                            | Ref                                        | Ref               | Ref                                                 | Ref                 |
| Word fluency <sup>4</sup>              |                                            |                   |                                                     |                     |
| 1st tercile                            | 1.10 (0.90, 1.34)                          | 1.01 (0.86, 1.19) | 1.23 (0.75, 2.00)                                   | 1.09 (0.95, 1.25)   |
| 2nd tercile                            | 1.18 (0.97, 1.43)                          | 1.01 (0.86, 1.19) | 0.81 (0.48, 1.39)                                   | 1.08 (0.94, 1.23)   |
| 3rd tercile                            | Ref                                        | Ref               | Ref                                                 | Ref                 |

OR, Odds ratios; CI, confidence interval; Ref, Reference.

<sup>1</sup>A six-year change in cognitive scores was expressed as race- and gender-specific ‘studentized’ residuals. Scores were categorized into three groups according to terciles. The first tercile consisted of people with the greatest cognitive decline.

<sup>2</sup>OR and 95% CI from multinomial logistic regression models estimated the associations between cognitive decline, and odds of last dental visit > 36 mos and 12- < 36 mos vs. < 12 mos.

<sup>3</sup>OR and 95% CI from multinomial logistic regression models estimated the associations between cognitive decline, and odds of not visiting a dentist and visiting a dentist only when problems occur vs. visiting a dentist on a regular basis.

<sup>4</sup>Adjusted for age, gender, race-center, education, cigarette use, alcohol use, and health history.

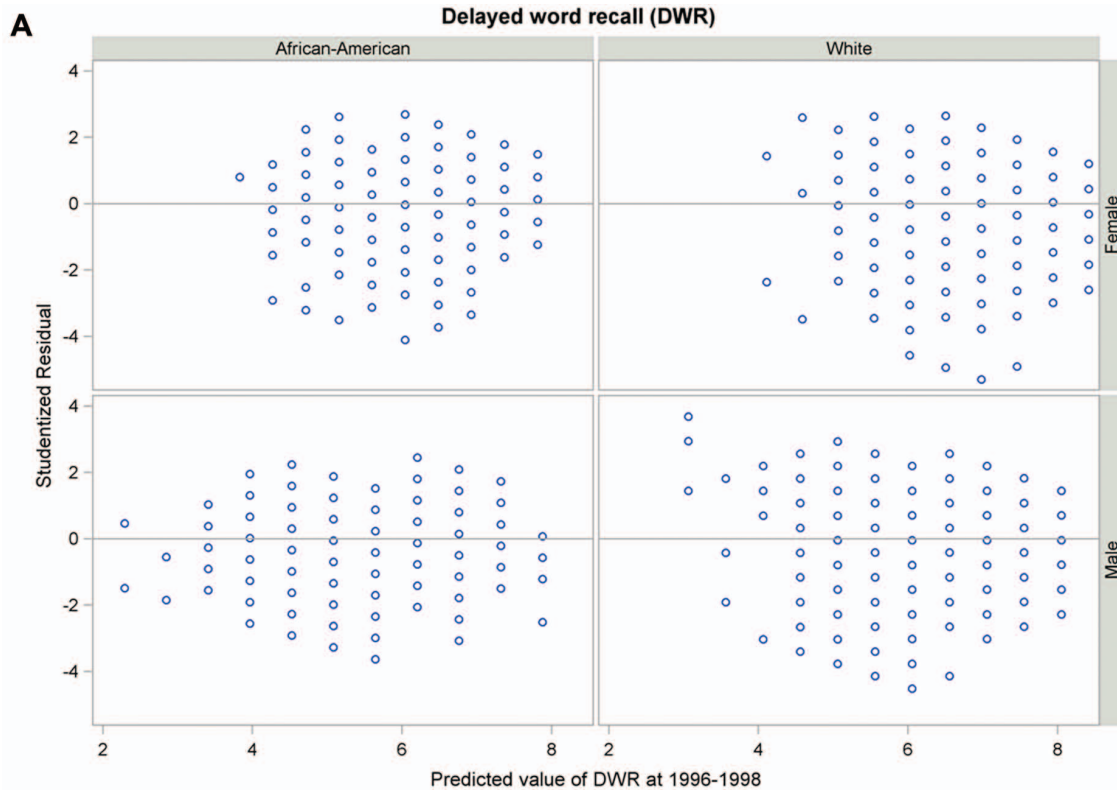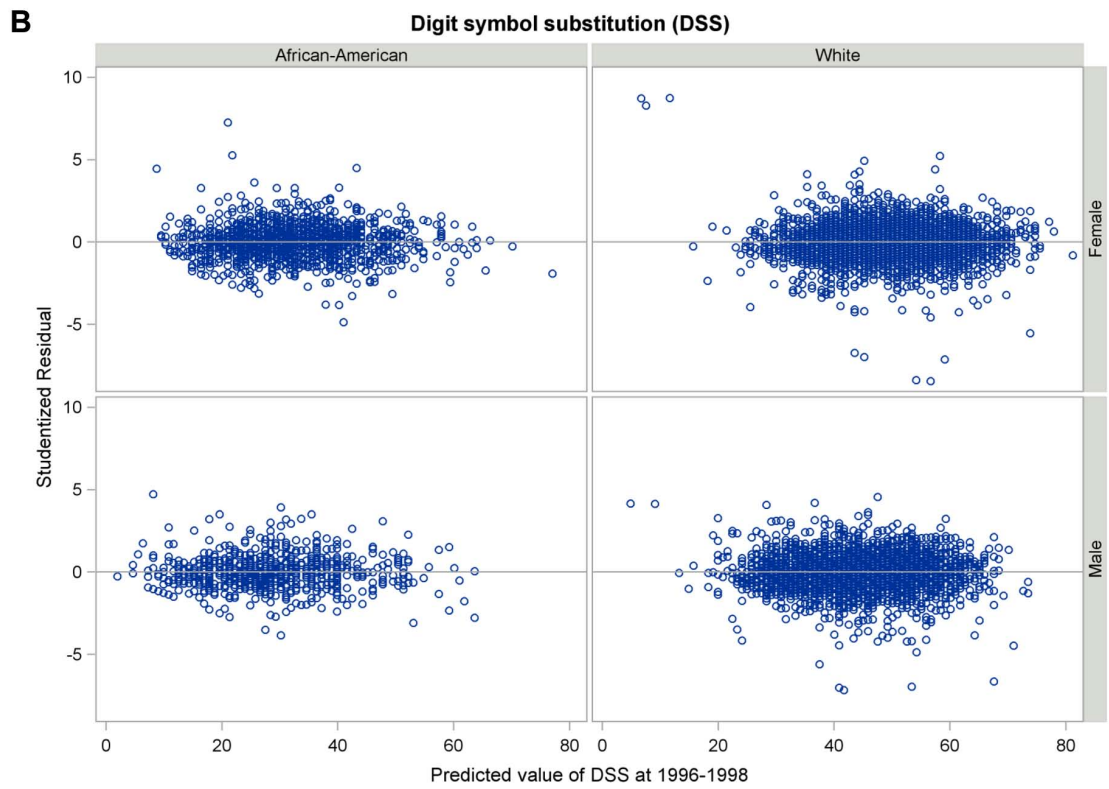

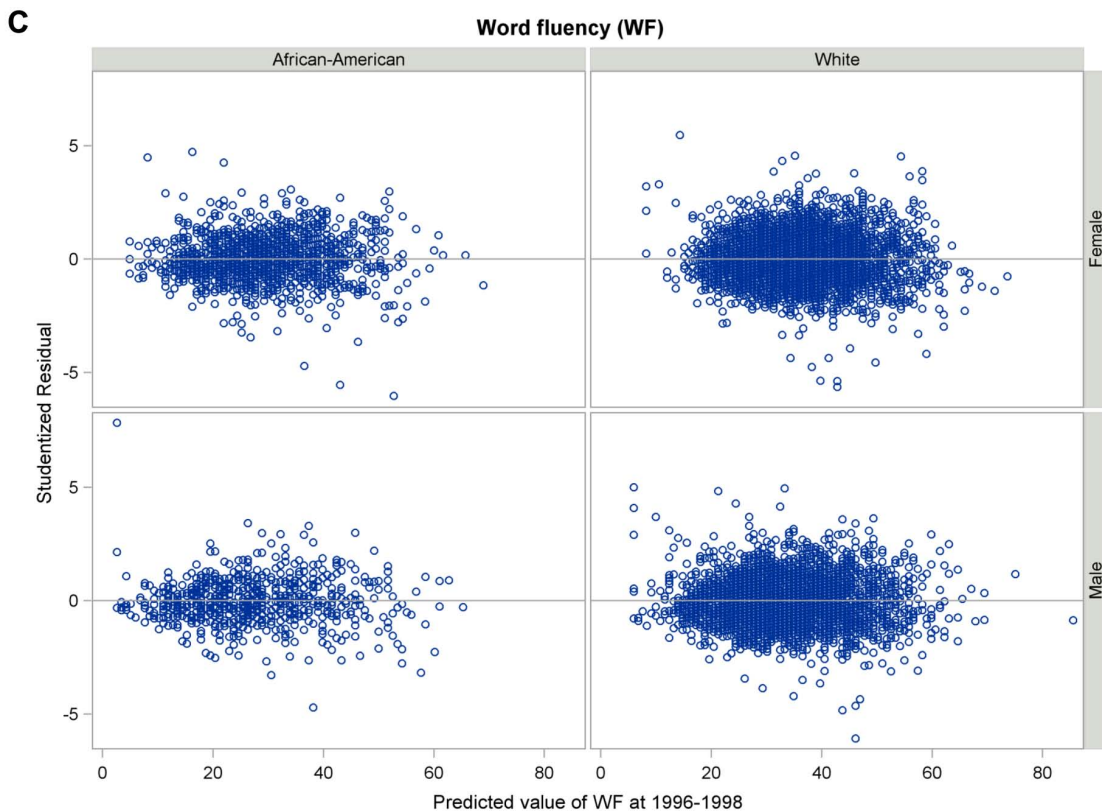

**Appendix Figure 1.** ‘Studentized’ residuals and predicted values of delayed word recall scores.

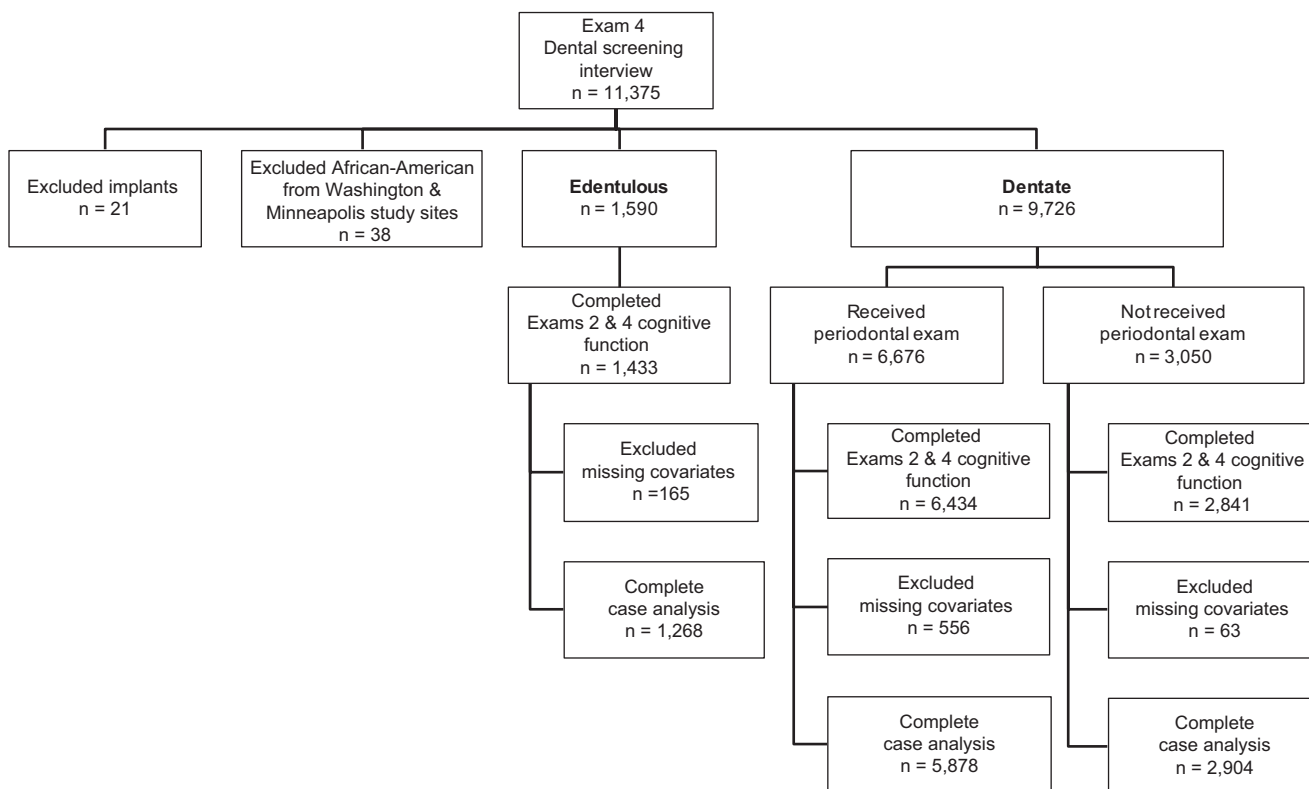

**Appendix Figure 2.** Numbers of study participants for complete case analysis with respect to their dentition status.
